# Supplementary material
Source: PubMed Central journal article supplement (PMC7295478)
Supplement: mmc1.pdf [file mmc1.pdf]

**Cell Host & Microbe, Volume 28**

## **Supplemental Information**

### **BCG Vaccination in Humans**

#### **Elicits Trained Immunity**

#### **via the Hematopoietic Progenitor Compartment**

**Branko Cirovic, L. Charlotte J. de Bree, Laszlo Groh, Bas A. Blok, Joyce Chan, Walter J.F.M. van der Velden, M.E.J. Bremmers, Reinout van Crevel, Kristian Händler, Simone Picelli, Jonas Schulte-Schrepping, Kathrin Klee, Marije Oosting, Valerie A.C.M. Koeken, Jakko van Ingen, Yang Li, Christine S. Benn, Joachim L. Schultze, Leo A.B. Joosten, Nigel Curtis, Mihai G. Netea, and Andreas Schlitzer**

## Supplemental Figures

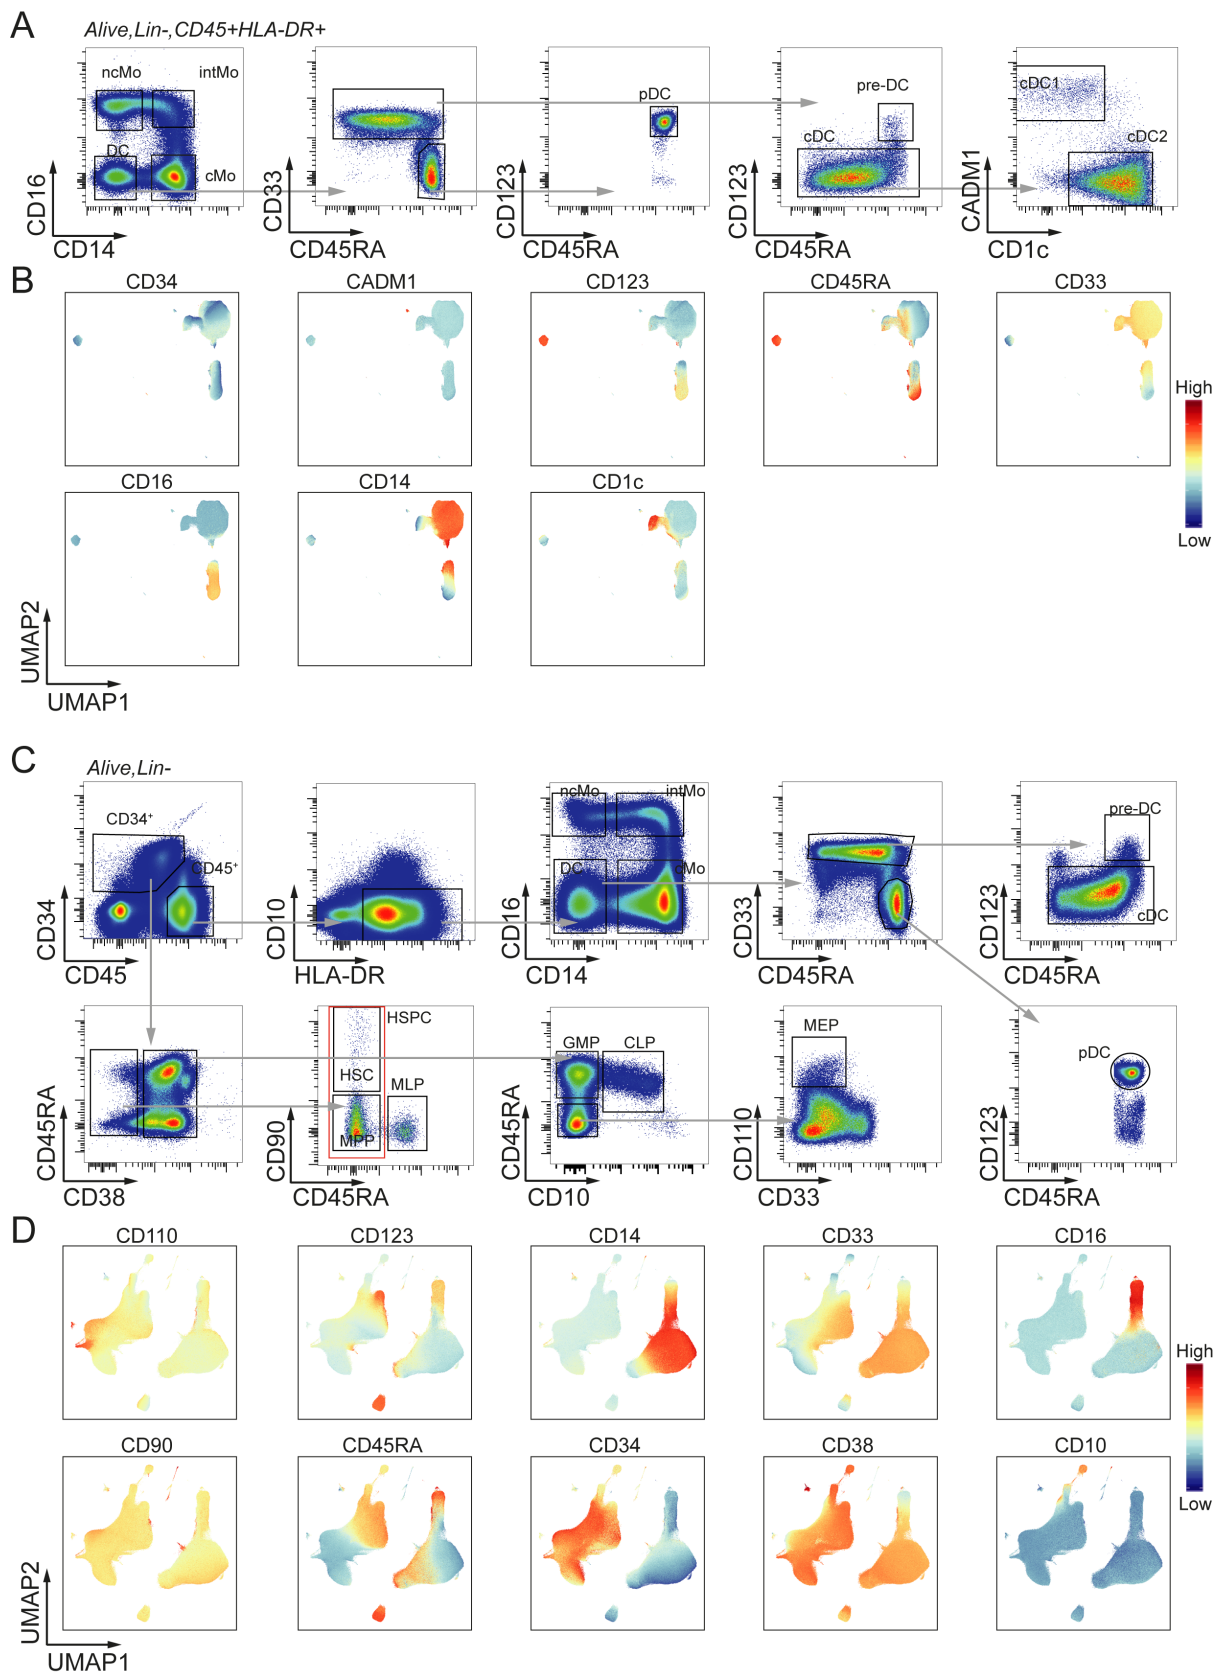

**Fig. S1 related to Figure 1. Gating strategy and surface marker expression. (A)** Representative manual gating strategy to identify cell lineages in PBMCs and region annotation in the low dimensional space. **(B)** Color-coded expression levels overlaid in the reduced low dimensional space (UMAP) of the PBMC. **(C)** Representative

manual gating strategy to identify cell lineages in the MNC BM fraction and region annotation in the low dimensional space. Combined HSC/MPP (HSPC) was sorted for transcriptomic analysis. **(D)** Colour-coded expression levels overlayed in the reduced low dimensional space (UMAP) of the MNC BM compartment for the individual surface markers used for flow cytometric analysis.

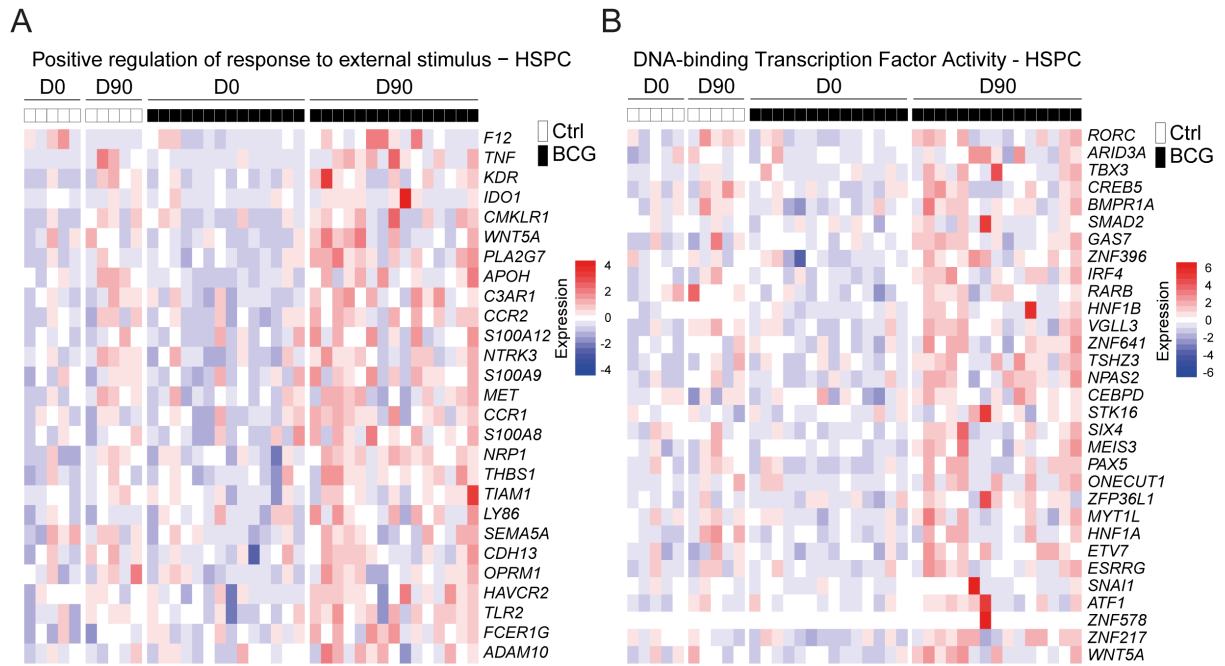

**Fig. S2 related to Figure 3 and 4. Genes associated to gene ontology terms in HSPCs DEG from BCG-vaccinated individuals. (A)** Expression heatmap of HSPCs for the enriched term “Positive regulation of response to external stimulus” (GO:0032103). **(B)** Expression heatmap of genes overlapping upregulated DEGs in HSPCs and genes associated with the term “DNA binding transcription factor activity” (GO:0003700).

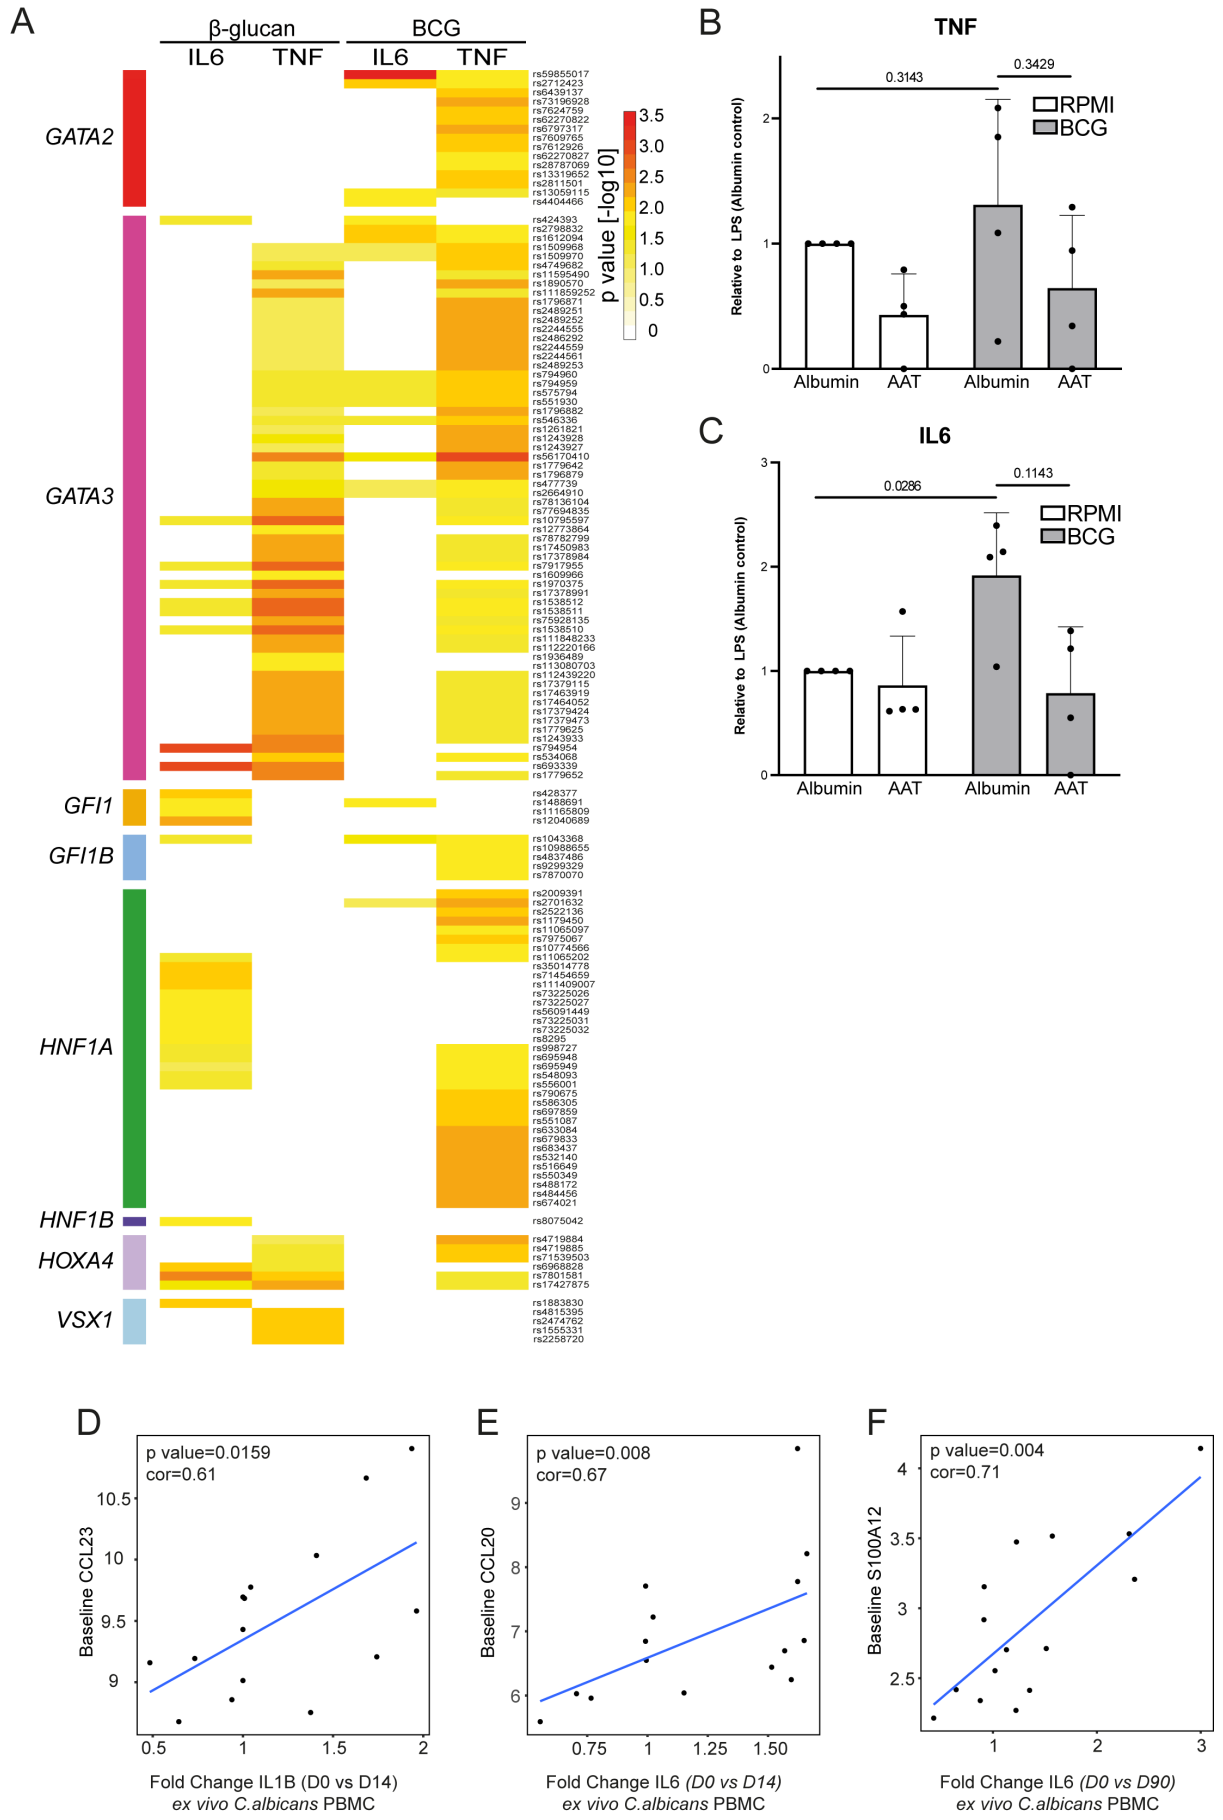

**Fig. S3 related to Figure 5. Transcription factors associated with BCG-induced trained immunity.** (A) Ex vivo training of PBMCs with  $\beta$ -glucan or BCG and IL6/TNF cytokine measurements after LPS challenge. SNPs  $\pm$  250kb within the genomic locus of all the transcription factors corresponding to the enriched TFBS gene signatures and variants thereof significantly leading to a change in cytokine production for any of the conditions are listed. Threshold for inclusion,  $p$  value  $<$  0.01. SNP association to the transcription factors is indicated by color coding in the first column of the heatmap. (B/C). Human primary monocytes were trained in-vitro with BCG for 24h, in the presence of either albumin (as control) or AAT (both at 100 g/ml). After washing the cells and resting them in culture medium for 5 days, restimulation with LPS (10 ng/ml) was done for another 24 h, after which TNF (C) or IL6 (D) were measured by ELISA. (D) Fold changes of IL1B after ex vivo *C. albicans* restimulation and serum CCL23 (D0 vs D14) correlated in the same individuals. Data points from BCG-vaccinated or Ctrl-treated individuals are shown in black or grey, respectively. (E) Fold changes of IL6 after ex vivo *C. albicans* restimulation and serum CCL29 (D0 vs D14) correlated in the same individuals. Data points from BCG-vaccinated or Ctrl-treated individuals are shown in black or grey, respectively. (F) Fold changes of IL6 after ex vivo *C. albicans* restimulation and serum S100A12 (D0 vs D90) correlated in the same individuals. Data points from BCG-vaccinated or Ctrl-treated individuals are shown in black or grey, respectively. See also Table S14.

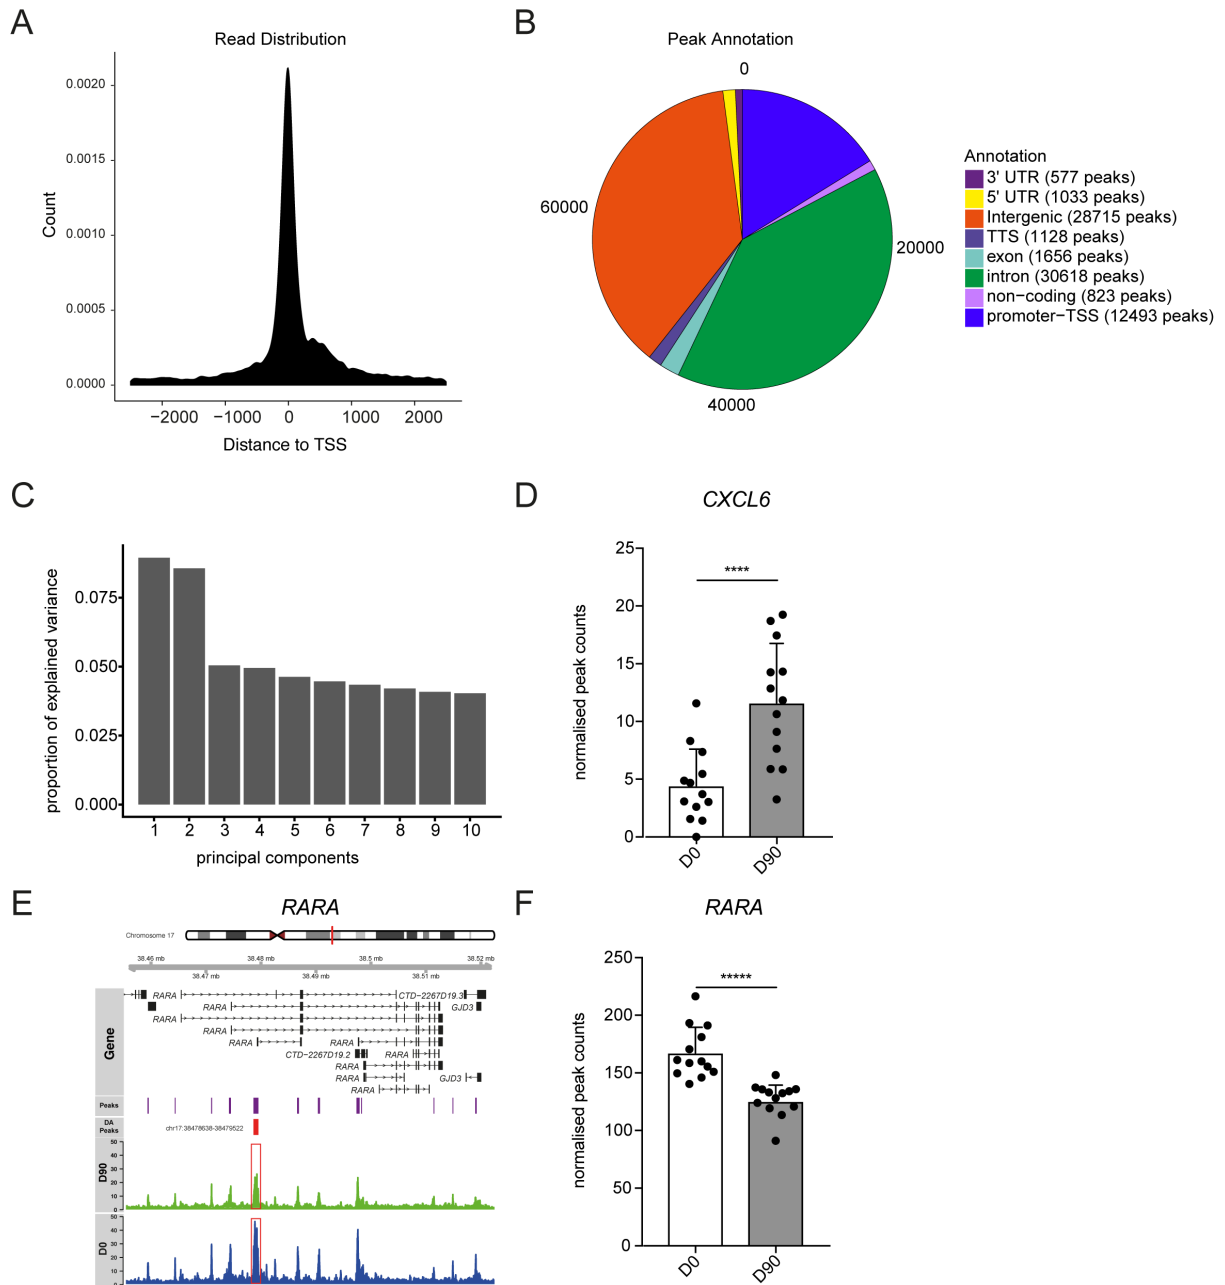

**Fig. S4 related to Figure 6. BCG-induced alterations in open chromatin regions in CD14<sup>+</sup> monocytes. (A)** Distribution of reads relative to the transcription start site (TSS) of the closest gene. **(B)** Classification of all detected peaks according to genomic functional elements. Associated number of peaks are displayed in brackets. **(C)** Contribution of the principal components 1 - 10 to the explained variance. **(D)** Normalised peak counts of the DA peak associated with the *CXCL6* genomic region. **(E)** Example genome track surrounding the *RARA* region. Called peaks are visualized in violet and differentially accessible (DA) peaks in red. Summarized reads from CD14<sup>+</sup> monocytes before and after vaccination are shown in blue and green, respectively. **(F)** Normalised peak counts of the DA peak associated with the *RARA* genomic region (n = 13, per group; \*\*\*\*, p value < 10<sup>-4</sup>; \*\*\*\*\*, p value < 10<sup>-7</sup>). UTR, untranslated region.

## Supplemental Tables

**Table S1. Raw cytokine data.** Related to Figure 1.

Raw cytokine concentrations from supernatants of PBMCs cultured in presence of *C.albicans* for 24h [pg/ml]

| Donor | Condition | Timepoint | IL10  | IL1B    | IL1RA   | IL6     | IFNA | IFNG    | TNFA    |
|-------|-----------|-----------|-------|---------|---------|---------|------|---------|---------|
| 1     | BCG       | D0        | 205.0 | 18000.0 | 56515.1 | 20524.2 | 1.1  | 36211.1 | 6645.1  |
| 2     | BCG       | D0        | 202.6 | 17255.9 | 59932.6 | 14085.5 | 7.5  | 23157.2 | 5574.9  |
| 3     | Control   | D0        | 212.4 | 14329.8 | 45704.6 | 15899.3 | 3.1  | 20648.7 | 3537.8  |
| 5     | BCG       | D0        | 207.5 | 13755.8 | 75033.1 | 25517.6 | 1.1  | 40232.0 | 6752.3  |
| 6     | BCG       | D0        | 496.7 | 18000.0 | 56547.6 | 44112.9 | 6.4  | 11658.4 | 7283.4  |
| 7     | Control   | D0        | 159.9 | 18000.0 | 75164.7 | 50846.7 | 1.1  | 63158.1 | 7681.0  |
| 8     | BCG       | D0        | 230.6 | 6250.6  | 23704.4 | 27507.2 | 1.1  | 4681.3  | 2484.3  |
| 9     | BCG       | D0        | 374.5 | 13080.5 | 78447.3 | 10166.7 | 1.1  | 8924.8  | 3916.0  |
| 10    | BCG       | D0        | 154.4 | 10331.6 | 45810.7 | 29154.5 | 1.1  | 5152.0  | 2882.5  |
| 11    | Control   | D0        | 301.1 | 14250.5 | 51245.8 | 36899.4 | 7.9  | 19322.5 | 4370.8  |
| 12    | BCG       | D0        | 207.8 | 7427.0  | 48878.0 | 23363.0 | 1.1  | 9725.7  | 2443.5  |
| 13    | Control   | D0        | 110.3 | 8466.0  | 30593.9 | 21823.6 | 1.1  | 9647.9  | 1757.9  |
| 14    | BCG       | D0        | 338.8 | 8289.7  | 68207.1 | 29917.1 | 1.1  | 4659.2  | 2162.9  |
| 15    | BCG       | D0        | 290.9 | 9245.4  | 51601.4 | 20197.4 | 1.1  | 2522.0  | 1256.7  |
| 16    | BCG       | D0        | 152.5 | 12190.5 | 86836.7 | 10972.2 | 1.1  | 9033.7  | 879.8   |
| 17    | BCG       | D0        | 552.1 | 18000.0 | 77851.3 | 50563.1 | 1.1  | 12510.5 | 8962.8  |
| 18    | Control   | D0        | 307.7 | 18000.0 | 52019.3 | 24763.1 | 9.5  | 8172.3  | 1442.2  |
| 19    | BCG       | D0        | 600.1 | 12626.7 | 88402.3 | 45540.1 | 7.8  | 1015.2  | 3877.7  |
| 20    | BCG       | D0        | 209.8 | 18000.0 | 58265.5 | 25680.6 | 4.2  | 61236.9 | 9916.8  |
| 21    | BCG       | D0        | 102.4 | 16636.9 | 40056.0 | 20660.0 | 1.1  | 96000.0 | 6337.5  |
| 1     | BCG       | D14       | 322.2 | 18000.0 | 81313.0 | 33278.6 | 3.1  | 16974.2 | 9146.5  |
| 2     | BCG       | D14       | 263.0 | 18000.0 | 78309.3 | 22473.0 | 1.1  | 31104.3 | 7699.2  |
| 3     | Control   | D14       | 164.4 | 16023.2 | 39821.0 | 10360.2 | 6.1  | 56809.1 | 4546.1  |
| 5     | BCG       | D14       | 184.4 | 6657.4  | 48484.3 | 14178.6 | 1.1  | 21913.4 | 3700.3  |
| 6     | BCG       | D14       | 591.7 | 13191.3 | 29658.6 | 33806.0 | 7.6  | 17161.5 | 11244.4 |
| 7     | Control   | D14       | 151.6 | 16002.3 | 46344.9 | 33974.4 | 1.1  | 33662.2 | 8253.6  |
| 8     | BCG       | D14       | 197.4 | 10524.3 | 38164.0 | 27372.3 | 1.1  | 11846.0 | 4151.6  |
| 9     | BCG       | D14       | 355.1 | 17990.5 | 77350.9 | 16488.8 | 2.2  | 18109.8 | 2253.9  |
| 10    | BCG       | D14       | 397.6 | 18000.0 | 78539.4 | 48066.2 | 1.1  | 17387.1 | 5879.6  |
| 11    | Control   | D14       | 383.0 | 14372.7 | 53109.1 | 37284.8 | 12.5 | 96000.0 | 6450.1  |
| 12    | BCG       | D14       | 401.4 | 14577.2 | 87043.6 | 26896.6 | 6.4  | 8722.3  | 5266.0  |
| 13    | Control   | D14       | 109.2 | 9582.8  | 26961.1 | 23043.4 | 1.1  | 8409.1  | 3230.3  |
| 14    | BCG       | D14       | 287.7 | 16051.2 | 72706.9 | 46914.5 | 3.0  | 31482.0 | 4508.0  |
| 15    | BCG       | D14       | 147.8 | 9324.7  | 34397.3 | 14258.4 | 1.1  | 6779.2  | 3577.2  |
| 16    | BCG       | D14       | 132.2 | 11443.7 | 51157.2 | 10882.4 | 1.1  | 15441.5 | 6685.5  |
| 17    | BCG       | D14       | 591.5 | 18000.0 | 94088.8 | 50170.2 | 3.5  | 3578.2  | 8437.1  |
| 18    | Control   | D14       | 192.1 | 17517.4 | 47816.4 | 20434.4 | 8.7  | 22377.9 | 4833.5  |
| 19    | BCG       | D14       | 525.3 | 17775.7 | 74901.8 | 75600.0 | 35.6 | 2487.3  | 2754.9  |



|    |         |     |       |         |          |         |      |         |         |
|----|---------|-----|-------|---------|----------|---------|------|---------|---------|
| 20 | BCG     | D14 | 483.7 | 18000.0 | 87251.1  | 38888.9 | 4.5  | 96000.0 | 8807.9  |
| 21 | BCG     | D14 | 228.8 | 10720.9 | 35468.1  | 21137.0 | 1.1  | 19678.7 | 6495.9  |
| 1  | BCG     | D90 | 241.7 | 18000.0 | 59042.0  | 23202.5 | 3.8  | 37800.1 | 6954.6  |
| 2  | BCG     | D90 | 117.0 | 15343.0 | 51989.3  | 9105.9  | 1.1  | 15588.6 | 5525.8  |
| 3  | Control | D90 | 70.1  | 18000.0 | 54691.3  | 7478.0  | 2.4  | 44098.0 | 6942.9  |
| 5  | BCG     | D90 | 416.0 | 16768.9 | 108674.8 | 31313.2 | 1.1  | 34918.8 | 5481.5  |
| 6  | BCG     | D90 | 469.0 | 18000.0 | 51869.6  | 38757.5 | 5.5  | 4655.6  | 8023.0  |
| 7  | Control | D90 | 256.4 | 10442.5 | 38481.5  | 30895.2 | 1.3  | 50522.8 | 4759.9  |
| 8  | BCG     | D90 | 433.2 | 9260.4  | 46130.6  | 11845.1 | 9.9  | 12279.4 | 5331.6  |
| 9  | BCG     | D90 | 439.3 | 18000.0 | 69807.7  | 15387.6 | 5.5  | 35722.5 | 7606.9  |
| 10 | BCG     | D90 | 199.1 | 18000.0 | 73559.1  | 26711.7 | 4.3  | 25290.6 | 7403.8  |
| 11 | Control | D90 | 438.5 | 13738.3 | 53354.2  | 29081.0 | 8.6  | 30318.9 | 6266.1  |
| 12 | BCG     | D90 | 737.3 | 13399.1 | 127075.8 | 70049.5 | 42.2 | 8183.4  | 5525.8  |
| 13 | Control | D90 | 120.1 | 6746.7  | 29918.3  | 17278.8 | 1.6  | 15213.5 | 2812.6  |
| 14 | BCG     | D90 | 520.2 | 18000.0 | 75120.8  | 40479.9 | 0.9  | 38971.8 | 5018.8  |
| 15 | BCG     | D90 | 340.0 | 11410.6 | 64523.2  | 18459.7 | 1.1  | 11352.3 | 4291.1  |
| 16 | BCG     | D90 | 664.0 | 18000.0 | 120515.8 | 25927.8 | 8.1  | 74883.4 | 11024.5 |
| 17 | BCG     | D90 | 570.6 | 18000.0 | 61826.6  | 61795.5 | 4.1  | 8593.5  | 10659.8 |
| 18 | Control | D90 | 413.9 | 18000.0 | 67265.7  | 30735.6 | 31.2 | 30732.7 | 8225.8  |
| 19 | BCG     | D90 | 617.8 | 18000.0 | 100945.0 | 46465.8 | 14.3 | 8432.0  | 6488.8  |
| 20 | BCG     | D90 | 464.9 | 18000.0 | 105305.5 | 59351.2 | 10.4 | 96000.0 | 11942.6 |
| 21 | BCG     | D90 | 397.5 | 18000.0 | 81745.7  | 32474.0 | 2.7  | 77717.6 | 7073.0  |

**Table S4. Gene Ontology Enrichment (Biological Processes) in upregulated genes, HSPC D0 vs D90.**  
Related to Figure 4.

| <b>GO Term</b> | <b>Description</b>                                   | <b>GeneRatio</b> | <b>BgRatio</b> | <b>pvalue</b> | <b>p.adjust</b> | <b>qvalue</b> |
|----------------|------------------------------------------------------|------------------|----------------|---------------|-----------------|---------------|
| GO:0036230     | granulocyte activation                               | 51/643           | 491/16618      | 1.32E-10      | 2.24E-07        | 1.89E-07      |
| GO:0002446     | neutrophil mediated immunity                         | 51/643           | 494/16618      | 1.65E-10      | 2.24E-07        | 1.89E-07      |
| GO:0002283     | neutrophil activation involved in immune response    | 50/643           | 481/16618      | 1.97E-10      | 2.24E-07        | 1.89E-07      |
| GO:0043312     | neutrophil degranulation                             | 50/643           | 481/16618      | 1.97E-10      | 2.24E-07        | 1.89E-07      |
| GO:0042119     | neutrophil activation                                | 50/643           | 486/16618      | 2.84E-10      | 2.58E-07        | 2.17E-07      |
| GO:0060326     | cell chemotaxis                                      | 29/643           | 248/16618      | 1.14E-07      | 8.65E-05        | 7.28E-05      |
| GO:0044057     | regulation of system process                         | 41/643           | 487/16618      | 2.63E-06      | 1.71E-03        | 1.44E-03      |
| GO:0032103     | positive regulation of response to external stimulus | 27/643           | 261/16618      | 3.45E-06      | 1.96E-03        | 1.65E-03      |
| GO:0050922     | negative regulation of chemotaxis                    | 9/643            | 35/16618       | 5.26E-06      | 2.65E-03        | 2.23E-03      |
| GO:0061387     | regulation of extent of cell growth                  | 14/643           | 89/16618       | 7.64E-06      | 3.47E-03        | 2.92E-03      |
| GO:0019932     | second-messenger-mediated signaling                  | 24/643           | 229/16618      | 9.58E-06      | 3.95E-03        | 3.33E-03      |
| GO:0050920     | regulation of chemotaxis                             | 20/643           | 172/16618      | 1.14E-05      | 4.33E-03        | 3.65E-03      |
| GO:0060560     | developmental growth involved in morphogenesis       | 22/643           | 204/16618      | 1.43E-05      | 4.98E-03        | 4.19E-03      |
| GO:0071675     | regulation of mononuclear cell migration             | 9/643            | 40/16618       | 1.71E-05      | 5.54E-03        | 4.67E-03      |
| GO:1902668     | negative regulation of axon guidance                 | 5/643            | 10/16618       | 1.83E-05      | 5.54E-03        | 4.67E-03      |
| GO:0090066     | regulation of anatomical structure size              | 36/643           | 442/16618      | 2.20E-05      | 6.25E-03        | 5.27E-03      |
| GO:0006836     | neurotransmitter transport                           | 20/643           | 184/16618      | 3.09E-05      | 8.23E-03        | 6.93E-03      |
| GO:0030516     | regulation of axon extension                         | 12/643           | 76/16618       | 3.26E-05      | 8.23E-03        | 6.93E-03      |

|            |                                                          |        |           |          |          |          |
|------------|----------------------------------------------------------|--------|-----------|----------|----------|----------|
| GO:0045761 | regulation of adenylate cyclase activity                 | 12/643 | 77/16618  | 3.73E-05 | 8.92E-03 | 7.51E-03 |
| GO:0048638 | regulation of developmental growth                       | 26/643 | 282/16618 | 3.97E-05 | 9.02E-03 | 7.59E-03 |
| GO:0031279 | regulation of cyclase activity                           | 13/643 | 92/16618  | 5.18E-05 | 9.16E-03 | 7.71E-03 |
| GO:0002430 | complement receptor mediated signaling pathway           | 5/643  | 12/16618  | 5.39E-05 | 9.16E-03 | 7.71E-03 |
| GO:0042430 | indole-containing compound metabolic process             | 7/643  | 27/16618  | 5.67E-05 | 9.16E-03 | 7.71E-03 |
| GO:0006586 | indolalkylamine metabolic process                        | 6/643  | 19/16618  | 5.78E-05 | 9.16E-03 | 7.71E-03 |
| GO:0086014 | atrial cardiac muscle cell action potential              | 6/643  | 19/16618  | 5.78E-05 | 9.16E-03 | 7.71E-03 |
| GO:0086026 | atrial cardiac muscle cell to AV node cell signaling     | 6/643  | 19/16618  | 5.78E-05 | 9.16E-03 | 7.71E-03 |
| GO:0086066 | atrial cardiac muscle cell to AV node cell communication | 6/643  | 19/16618  | 5.78E-05 | 9.16E-03 | 7.71E-03 |
| GO:0051339 | regulation of lyase activity                             | 13/643 | 93/16618  | 5.81E-05 | 9.16E-03 | 7.71E-03 |
| GO:0032760 | positive regulation of tumor necrosis factor production  | 10/643 | 57/16618  | 5.85E-05 | 9.16E-03 | 7.71E-03 |
| GO:0097529 | myeloid leukocyte migration                              | 18/643 | 164/16618 | 6.70E-05 | 1.00E-02 | 8.42E-03 |
| GO:0086003 | cardiac muscle cell contraction                          | 10/643 | 58/16618  | 6.82E-05 | 1.00E-02 | 8.42E-03 |

**Table S5. BCG-induced changes in full blood cell count parameters from the MIS-BAIR study.**  
Related to Figure4.

| Parameter                                   | BCG-vaccinated<br>(n=385) | BCG-naïve<br>(n=409) | Adjusted <sup>a</sup>                    |                      |
|---------------------------------------------|---------------------------|----------------------|------------------------------------------|----------------------|
|                                             |                           |                      | Difference <sup>b</sup> (95% CI) in mean | p-value <sup>c</sup> |
| <b>White cell count (x10<sup>9</sup>/L)</b> |                           |                      |                                          |                      |
| Mean (sd)                                   | 14.32 (4.65)              | 13.85 (4.41)         | 0.50 (-0.10 – 1.09)                      | 0.100                |
| Median (IQR)                                | 13.4 (11.2 – 16.5)        | 13.1 (11.1 – 15.8)   |                                          |                      |
| <b>Neutrophil count (x10<sup>9</sup>/L)</b> |                           |                      |                                          |                      |
| Mean (sd)                                   | 7.29 (3.72)               | 6.80 (3.49)          | 0.51 (0.06 – 0.96)                       | 0.026                |
| Median (IQR)                                | 6.8 (4.6 – 9.2)           | 6.1 (4.4 – 8.6)      |                                          |                      |
| <b>Lymphocyte count (x10<sup>9</sup>/L)</b> |                           |                      |                                          |                      |
| Mean (sd)                                   | 4.63 (1.73)               | 4.56 (1.56)          | 0.07 (-0.15 – 0.29)                      | 0.544                |
| Median (IQR)                                | 4.3 (3.5 – 5.5)           | 4.4 (3.4 – 5.4)      |                                          |                      |
| <b>Monocyte count (x10<sup>9</sup>/L)</b>   |                           |                      |                                          |                      |
| Mean (sd)                                   | 1.59 (0.79)               | 1.59 (0.82)          | -0.01 (-0.12 – 0.10)                     | 0.917                |
| Median (IQR)                                | 1.4 (1.1 – 2)             | 1.5 (1 – 2)          |                                          |                      |

a) Adjusted for the following (potential confounders identified using bivariate regressions):

- WCC – age at the time of examination
- Neutrophils – age at the time of examination
- Lymphocytes – sex, age at the time of examination
- Monocytes – age at the time of examination

b) Mean complete blood count parameter value in BCG-vaccinated group – mean complete blood count parameter value in BCG-naïve group

c) Means compared using multivariate regression analysis

**Table S6. Baseline variables of the MIS-BAIR cohort.** Related to Figure 4

| <b>Parameter</b>                                    | <b>BCG-vaccinated (n=385)</b> | <b>BCG-naïve (n=409)</b> |
|-----------------------------------------------------|-------------------------------|--------------------------|
| <b>Sex</b>                                          |                               |                          |
| Male                                                | 190 (49.4%)                   | 194 (47.4%)              |
| <b>Birth method</b>                                 |                               |                          |
| Vaginal                                             | 248 (64.4%)                   | 256 (62.6%)              |
| Caesarean                                           | 137 (35.6%)                   | 153 (37.4%)              |
| <b>Gestational age (weeks)</b>                      |                               |                          |
| Mean (sd)                                           | 39.5 (1.3)                    | 39.3 (1.2)               |
| Median (IQR)                                        | 39.4 (38.5 – 40.5)            | 39.3 (38.4 – 40.3)       |
| <b>Birth weight (g)</b>                             |                               |                          |
| Mean (sd)                                           | 3422 (440)                    | 3423 (453)               |
| Median (IQR)                                        | 3430 (3130 – 3700)            | 3390 (3130 – 3740)       |
| <b>Age at FBE (hours)</b>                           |                               |                          |
| Mean (sd)                                           | 76.6 (81.8)                   | 75.4 (70.8)              |
| Median (IQR)                                        | 51.0 (48.4 – 64.6)            | 51.2 (48.4 – 64.9)       |
| <b>Time between randomisation &amp; FBE (hours)</b> |                               |                          |
| Mean (sd)                                           | 42.7 (73.8)                   | 39.9 (61.3)              |
| Median (IQR)                                        | 24.5 (7.6 – 42.1)             | 24.4 (5.4 – 43.9)        |

**Table S7. Effect of potential confounders on neutrophil count in the MIS-BAIR cohort.**

Related to Figure 4.

| <b>Parameters</b>                        | <b>Difference (95% CI) in mean neutrophil count<br/>(x10E9/L)</b> | <b>p-value</b> |
|------------------------------------------|-------------------------------------------------------------------|----------------|
| Female Sex                               | 0.25 (-0.26 – 0.75)                                               | 0.34           |
| Caesarean Birth method                   | -0.26 (-0.78 – 0.26)                                              | 0.325          |
| Gestational age (weeks)                  | 0.03 (-0.17 – 0.23)                                               | 0.781          |
| Birth weight (g)                         | -0.0001 (-0.0006 – 0.0005)                                        | 0.823          |
| Age at FBE (hours)                       | -0.02 <sup>a</sup> (-0.02 – -0.02)                                | <0.001         |
| Time between randomisation & FBE (hours) | -0.02 (-0.02 – -0.02)                                             | <0.001         |

a) i.e neutrophil count decreases with age by 0.02 x10<sup>9</sup>/L per hour

**Table S9. ATAC-sequencing alignment statistics and peak calls.** Related to Figure 6.

| <b>Sample Name</b> | <b>Sample nr</b> | <b>Donor</b> | <b>Time point</b> | <b>read Nr</b> | <b>one alignment</b> | <b>failed alignment</b> | <b>Suppressed alignment</b> | <b>Peak Nr</b> |
|--------------------|------------------|--------------|-------------------|----------------|----------------------|-------------------------|-----------------------------|----------------|
| S1Td0              | 3904             | 1            | D0                | 93147328       | 56235249             | 32324701                | 4587378                     | 14195          |
| S1Tm3              | 3905             | 1            | D90               | 22657866       | 14230772             | 7300268                 | 1126826                     | 23336          |
| S2Td0              | 3906             | 2            | D0                | 20152114       | 12423961             | 6711341                 | 1016812                     | 29669          |
| S2Tm3              | 3907             | 2            | D90               | 137207180      | 47726096             | 85350217                | 4130867                     | 27430          |
| S5Td0              | 3910             | 5            | D0                | 21277803       | 5075424              | 15758455                | 443924                      | 3513           |
| S5Tm3              | 3911             | 5            | D90               | 20731170       | 13507420             | 6139199                 | 1084551                     | 3430           |
| S8Td0              | 3916             | 8            | D0                | 35627324       | 21504396             | 12433288                | 1689640                     | 39393          |
| S8Tm3              | 3917             | 8            | D90               | 56393806       | 23938253             | 30602138                | 1853415                     | 10520          |
| S9Td0              | 3918             | 9            | D0                | 17027823       | 10364803             | 5798871                 | 864149                      | 18926          |
| S9Tm3              | 3919             | 9            | D90               | 26792118       | 6572971              | 19666841                | 552306                      | 2219           |
| S10Td0             | 3920             | 10           | D0                | 16979891       | 7430930              | 9042480                 | 506481                      | 6642           |
| S10Tm3             | 3921             | 10           | D90               | 81294788       | 32847495             | 45648344                | 2798949                     | 24252          |
| S12Td0             | 3924             | 12           | D0                | 13883512       | 9029369              | 4195436                 | 658707                      | 8298           |
| S12Tm3             | 3925             | 12           | D90               | 139826704      | 41469901             | 94962963                | 3393840                     | 27851          |
| S14Tdo             | 3928             | 14           | D0                | 19723687       | 15191229             | 3466721                 | 1065737                     | 21920          |
| S14Tm3             | 3929             | 14           | D90               | 362450317      | 98517998             | 255753253               | 8179066                     | 55202          |
| S16Td0             | 3932             | 16           | D0                | 22649770       | 13505333             | 8093293                 | 1051144                     | 26304          |
| S16Tm3             | 3933             | 16           | D90               | 47461683       | 28968659             | 16228026                | 2264998                     | 19826          |
| S17Td0             | 3934             | 17           | D0                | 34096880       | 20904292             | 11488559                | 1704029                     | 17201          |
| S17Tm3             | 3935             | 17           | D90               | 17527738       | 11379669             | 5271475                 | 876594                      | 7250           |
| S19Td0             | 3938             | 19           | D0                | 19177190       | 11745295             | 6484450                 | 947445                      | 12957          |
| S19Tm3             | 3939             | 19           | D90               | 63824163       | 17721373             | 44596616                | 1506174                     | 17416          |
| S20Td0             | 3940             | 20           | D0                | 15914647       | 9910524              | 5201102                 | 803021                      | 22056          |
| S20Tm3             | 3941             | 20           | D90               | 21983401       | 14002305             | 6819209                 | 1161887                     | 10553          |
| S21Td0             | 3942             | 21           | D0                | 40965843       | 20446301             | 18816958                | 1702584                     | 24391          |
| S21Tm3             | 3943             | 21           | D90               | 26426022       | 16240969             | 8825666                 | 1359387                     | 12297          |



**Table S11. Enriched TFBS motifs in opening peaks (D0 vs D90) vs sampled background peaks in CD14<sup>+</sup> monocytes. Related to Figure 6.**

| <b>TFBS Motif</b> | <b>#positive Hits<br/>(per 1000bp)</b> | <b>#Hits in Background set<br/>(per 1000bp)</b> | <b>Site p value</b> | <b>Site FDR</b> |
|-------------------|----------------------------------------|-------------------------------------------------|---------------------|-----------------|
| FOXP2.1           | 35.33                                  | 26.61                                           | 0                   | 0               |
| TBP.1             | 30.40                                  | 23.59                                           | 0                   | 0               |
| SOX-6.1           | 63.93                                  | 49.95                                           | 0                   | 0               |
| B-ATF.1           | 53.94                                  | 43.87                                           | 0                   | 0               |
| FOXA2.1           | 18.27                                  | 13.59                                           | 4.2331E-290         | 1.3334E-288     |
| KLF1.1            | 5.48                                   | 3.51                                            | 5.0517E-190         | 1.273E-188      |
| POU5F1;SOX-2.1    | 7.63                                   | 5.25                                            | 1.6552E-187         | 3.476E-186      |
| FOXA1.1           | 11.06                                  | 8.23                                            | 7.7918E-176         | 1.4025E-174     |
| SOX-2.1           | 16.04                                  | 12.67                                           | 1.1595E-168         | 1.8263E-167     |
| FOXH1.1           | 2.48                                   | 1.35                                            | 1.2096E-149         | 1.6935E-148     |
| FOXO1.1           | 7.10                                   | 5.05                                            | 1.1098E-148         | 1.3984E-147     |
| CEBPdelta.1       | 29.91                                  | 25.60                                           | 3.0999E-140         | 3.5508E-139     |
| GATA-4.1          | 15.50                                  | 12.51                                           | 1.5453E-137         | 1.6226E-136     |
| CEBPbeta.1        | 28.48                                  | 24.85                                           | 7.5604E-104         | 7.3278E-103     |
| IRF-4.1           | 37.53                                  | 33.40                                           | 3.9136E-100         | 3.5222E-99      |
| Mxi-1.1           | 3.09                                   | 2.02                                            | 1.2014E-99          | 1.00919E-98     |
| NANOG.1           | 54.87                                  | 49.95                                           | 9.08868E-97         | 7.15734E-96     |
| GATA-1.1          | 11.99                                  | 9.92                                            | 4.01315E-85         | 2.97446E-84     |
| c-Jun.1           | 15.39                                  | 13.18                                           | 2.15968E-73         | 1.51177E-72     |
| FOXA3.1           | 4.50                                   | 3.36                                            | 2.33898E-71         | 1.55111E-70     |
| SMAD1.1           | 6.45                                   | 5.10                                            | 2.27916E-68         | 1.43587E-67     |
| GATA-2.1          | 4.55                                   | 3.45                                            | 8.24929E-67         | 4.94957E-66     |
| VDR.1             | 0.20                                   | 0.04                                            | 7.41055E-66         | 4.24422E-65     |
| PRDM1.1           | 0.14                                   | 0.02                                            | 2.81795E-62         | 1.54375E-61     |
| PU1.1             | 46.36                                  | 42.84                                           | 3.17184E-59         | 1.66522E-58     |
| TCF-7L2.1         | 0.20                                   | 0.04                                            | 5.81875E-59         | 2.93265E-58     |
| TCF-7L1.1         | 0.22                                   | 0.05                                            | 1.02693E-58         | 4.97667E-58     |
| FOXP1.1           | 6.60                                   | 5.36                                            | 7.02168E-55         | 3.27678E-54     |
| MEF-2C.1          | 0.13                                   | 0.02                                            | 1.09186E-50         | 4.91336E-50     |
| MEF-2A.1          | 0.15                                   | 0.03                                            | 5.52439E-47         | 2.40025E-46     |

**Table S12. List of antibodies and secondary staining reagents for flow cytometric analysis.**

Related to Methods section.

| <b>Name</b>  | <b>Fluorophore</b> | <b>Clone</b> | <b>Source</b>           | <b>Use</b>     |
|--------------|--------------------|--------------|-------------------------|----------------|
| CADM1        | -(Biotin)          | 3E1          | MBL                     | PBMC           |
| CD10         | APC/Cy7            | HI10a        | BioLegend               | PBMC (Lin)     |
| CD10         | APC                | HI10a        | BioLegend               | BM             |
| CD110        | PE-CF594           | 1.6.1        | BD Biosciences          | BM             |
| CD115        | PE/Cy7             | 12-3A3-1B10  | ThermoFisher Scientific | PBMC           |
| CD116        | BV421              | hGM-CSFR-M1  | BD Biosciences          | PBMC           |
| CD123        | BV785              | 6H6          | BioLegend               | BM, PBMC       |
| CD135        | PE                 | 4G8          | BD Biosciences          | BM             |
| CD14         | BV711              | M5E2         | BioLegend               | PBMC           |
| CD14         | BV421              | HCD14        | BioLegend               | BM             |
| CD15         | APC/Fire 750       | W6D3         | BioLegend               | BM, PBMC (Lin) |
| CD16         | BV510              | 3G8          | BioLegend               | PBMC           |
| CD16         | PE/Cy7             | 3G8          | BioLegend               | BM             |
| CD19         | APC/Cy7            | SJ25C1       | BioLegend               | BM, PBMC (Lin) |
| CD1c         | PE/Dazzle 594      | L161         | BioLegend               | PBMC           |
| CD20         | APC/Cy7            | 2H7          | BioLegend               | BM, PBMC (Lin) |
| CD3          | APC/Cy7            | OKT3         | BioLegend               | BM, PBMC (Lin) |
| CD33         | BV650              | WM53         | BioLegend               | PBMC           |
| CD34         | AF700              | 581          | BioLegend               | BM, PBMC       |
| CD38         | BV510              | HB-7         | BioLegend               | BM             |
| CD45         | PerCP              | HI30         | BioLegend               | BM, PBMC       |
| CD45RA       | FITC               | HI100        | BioLegend               | BM, PBMC       |
| CD7          | APC-eFluor 780     | eBio124-1D1  | ThermoFisher Scientific | BM, PBMC (Lin) |
| CD90         | BV711              | 5E10         | BD Biosciences          | BM             |
| CX3CR1       | APC                | 2A9-1        | BioLegend               | PBMC           |
| HLA-DR       | BV570              | L243         | BioLegend               | BM, PBMC       |
| Streptavidin | PE                 | -            | BioLegend               | PBMC           |
| DRAQ7        | DRAQ7              | -            | Biolegend               | BM, PBMC       |
